# Supplementary material
Source: PubMed Central journal article supplement (PMC3746557)

**A** 50 nm AbBNP with 10 Ab/BNP

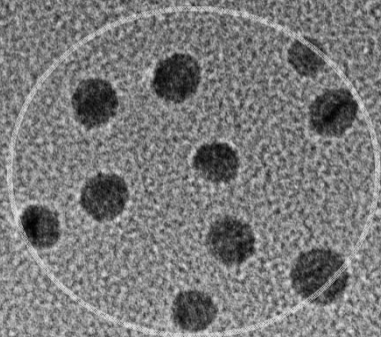

**20 nm**

**B** 50 nm AbBNP with 100 Ab/BNP

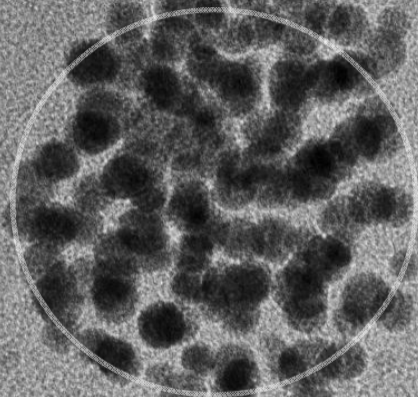

**20 nm**

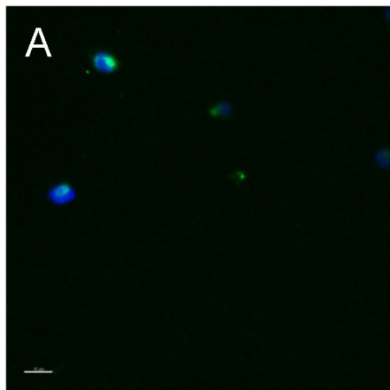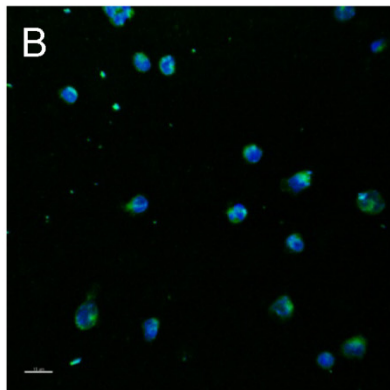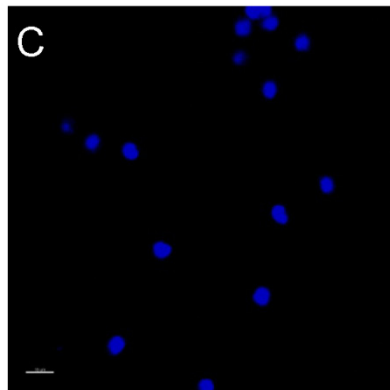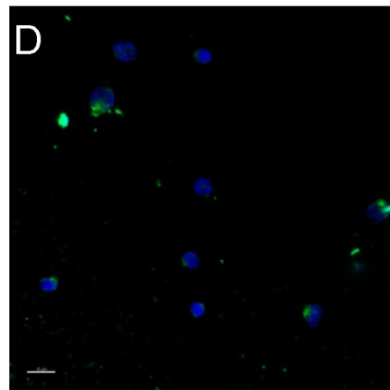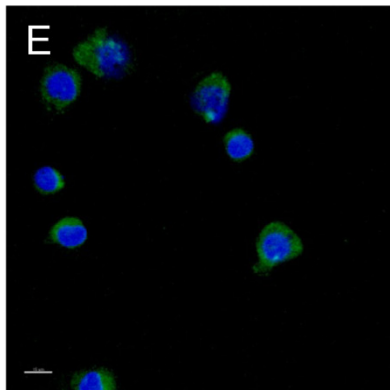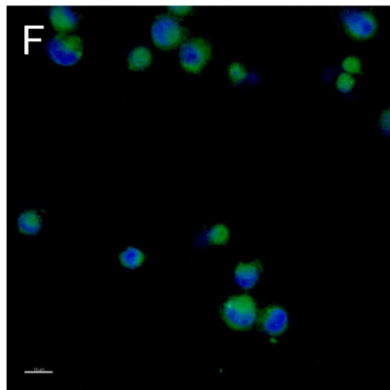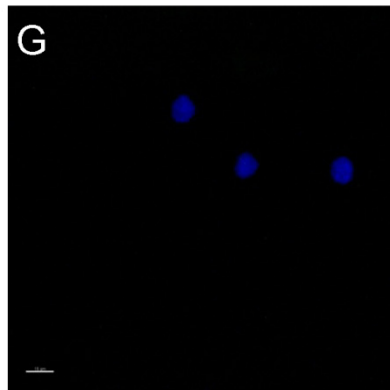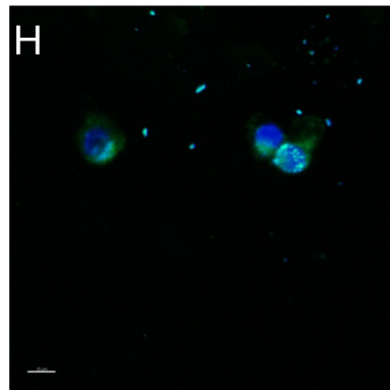

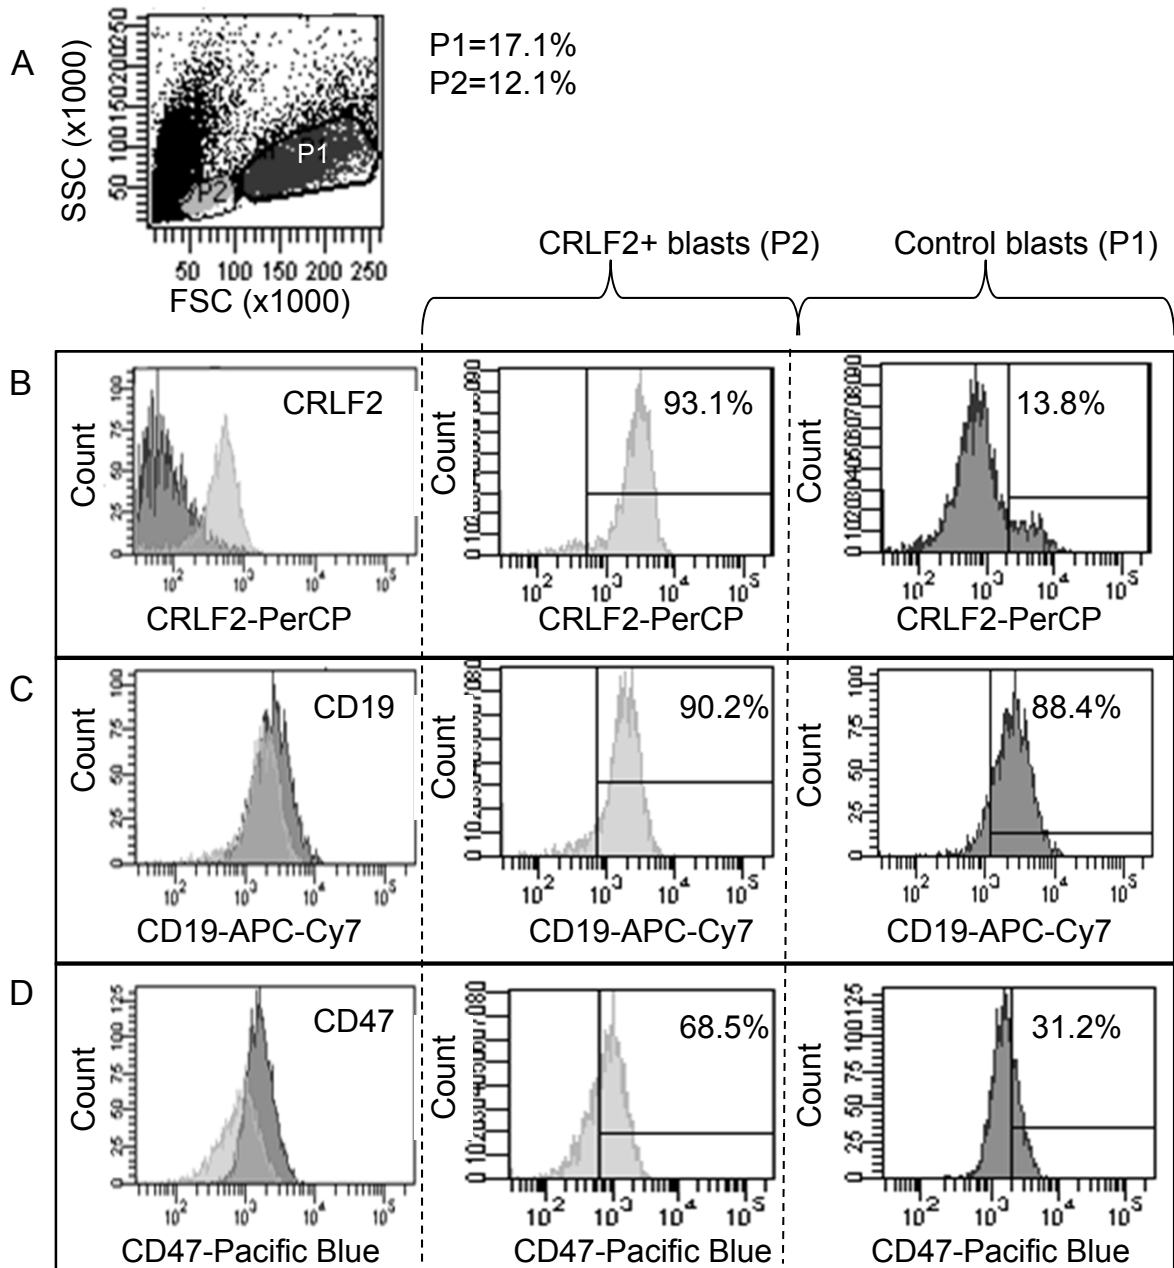

50 nm AbBNPs; CRLF2+ blasts

50 nm with 10 Ab/BNP

**A**

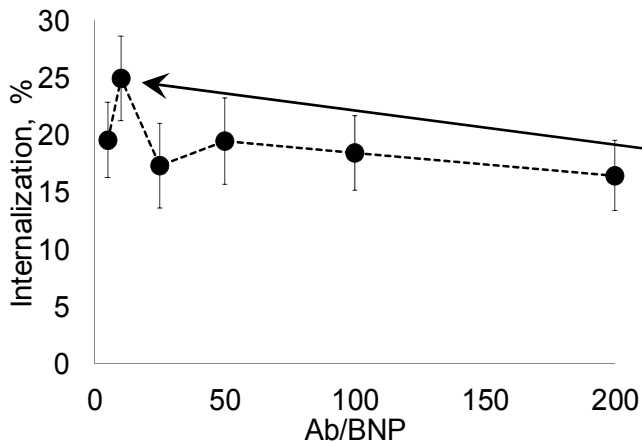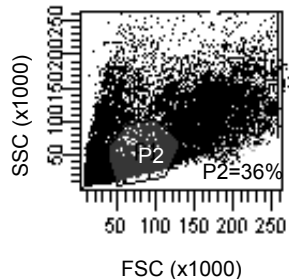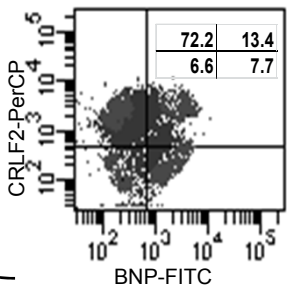

100 nm AbBNPs; CRLF2+ blasts

100 nm with 25 Ab/BNP

**B**

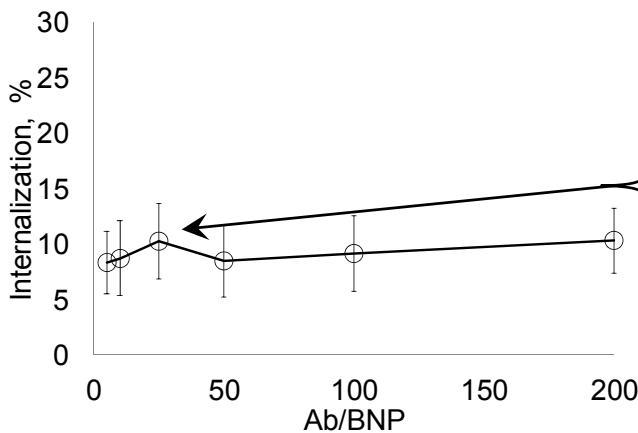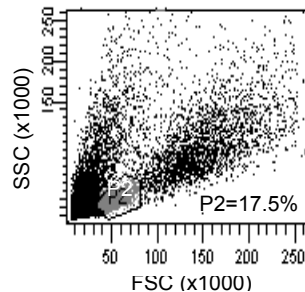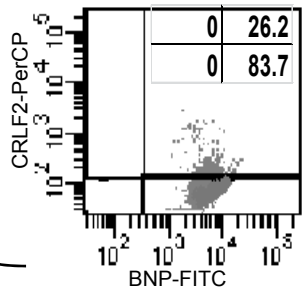

**C** 50 nm AbBNPs; control blasts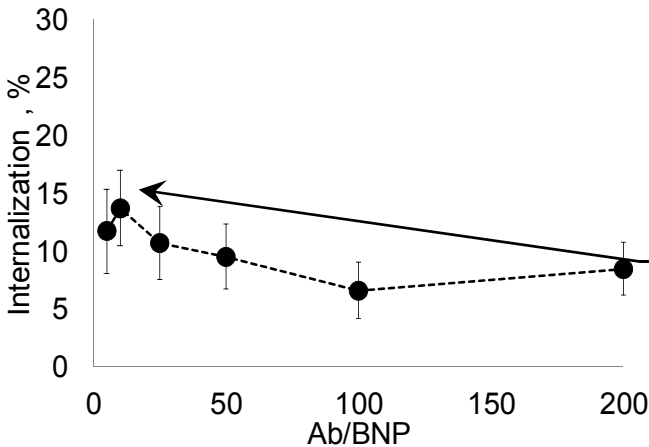

## 50 nm with 10 Ab/BNP

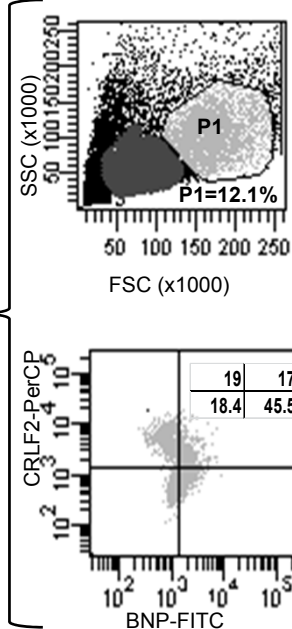**D** 100 nm AbBNPs; control blasts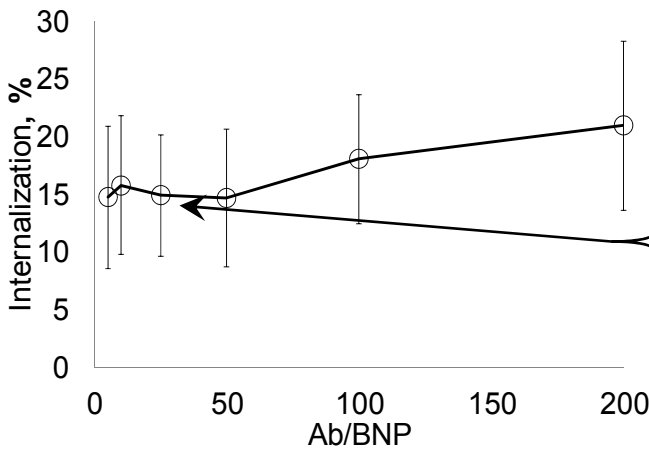

## 100 nm with 25 Ab/BNP

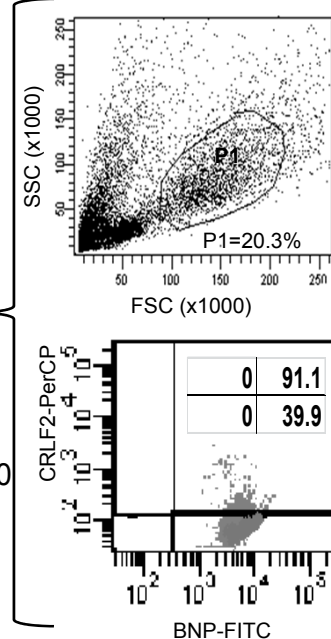

50 nm with 10Ab/BNP

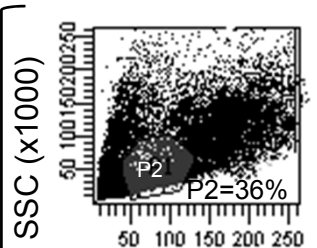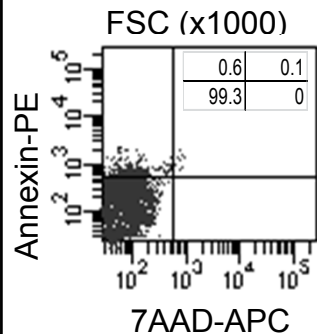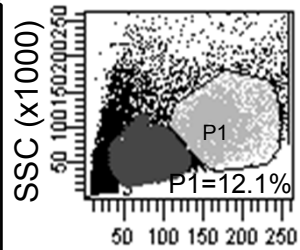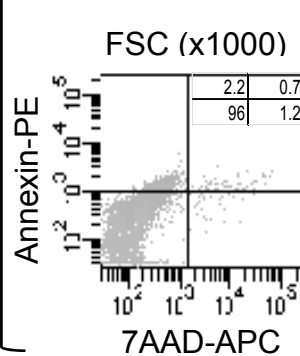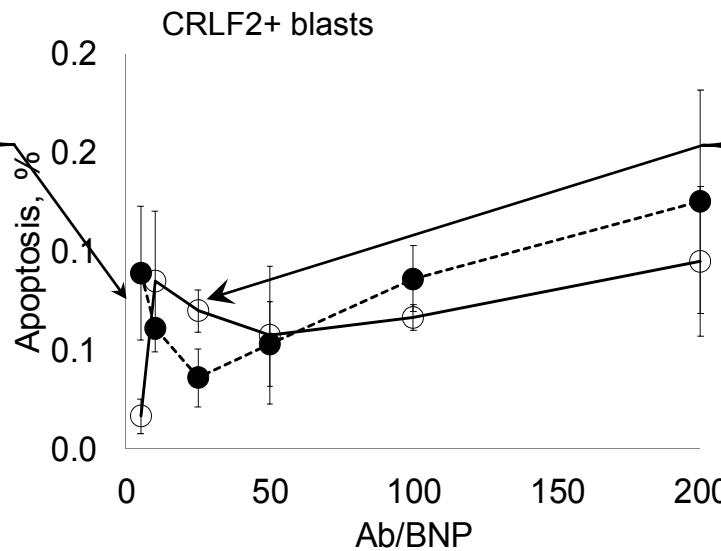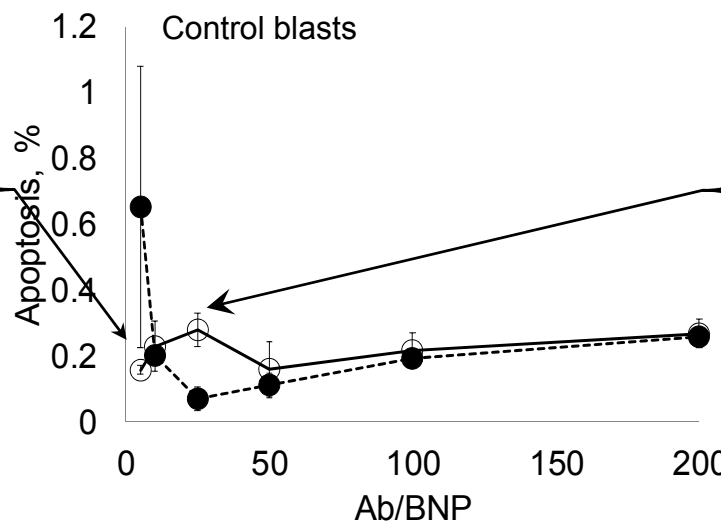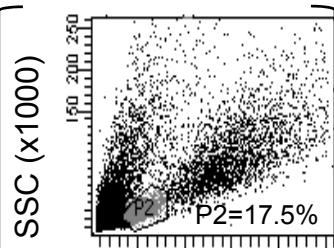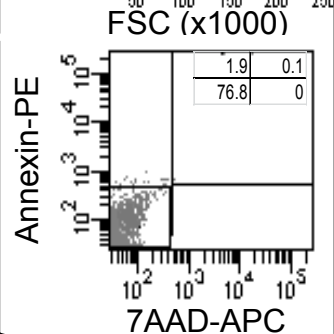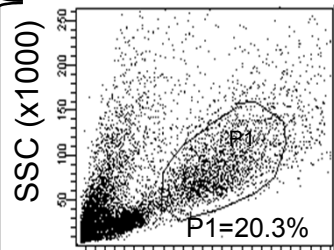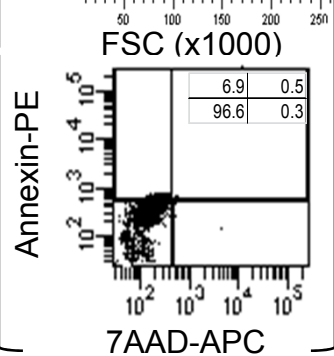

100 nm with 25Ab/BNP

No AbBNPs

50 nm with 10Ab/BNP

100 nm with 25 Ab/BNP

CRLF2+ blasts (P2)

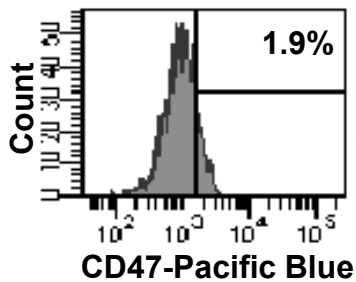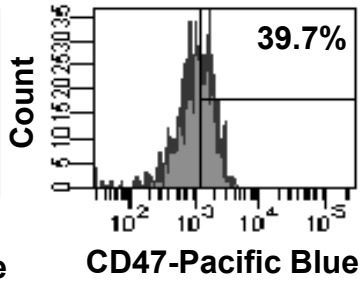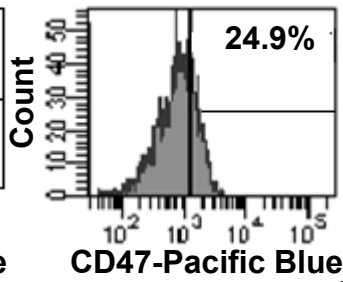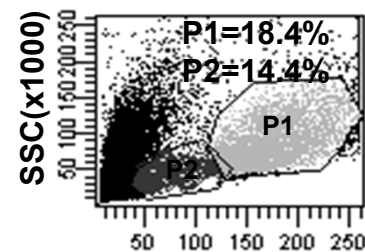

No AbBNPs

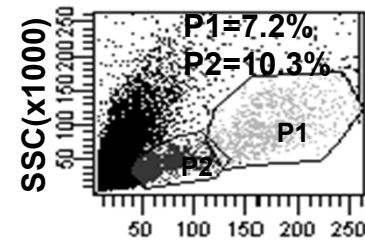

50 nm with 10Ab/BNP

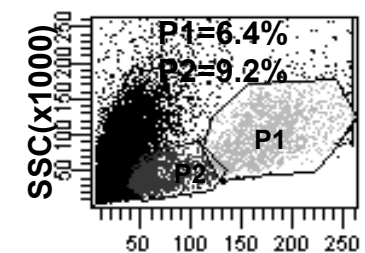

100 nm with 25 Ab/BNP

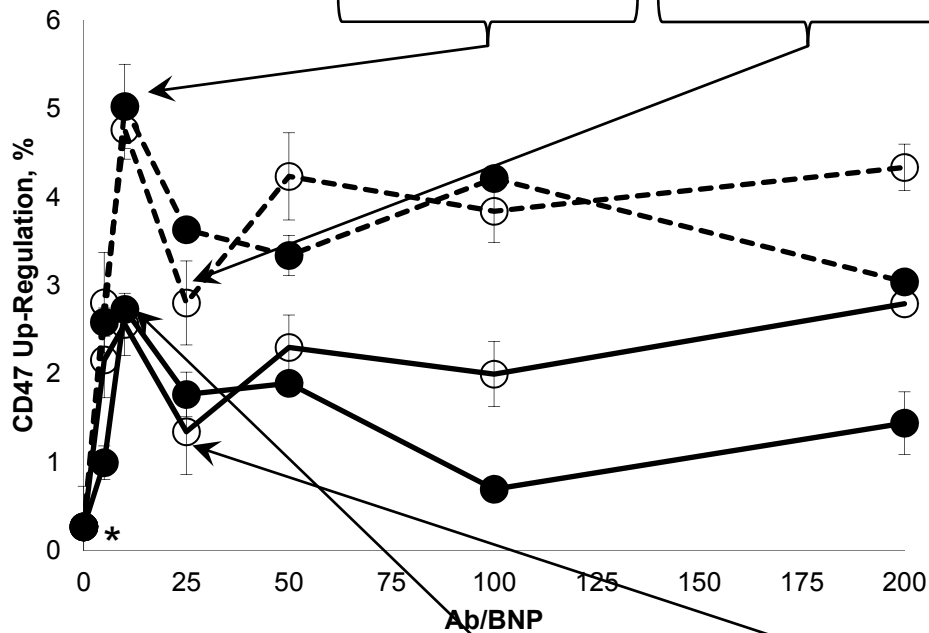

Control blasts (P1)

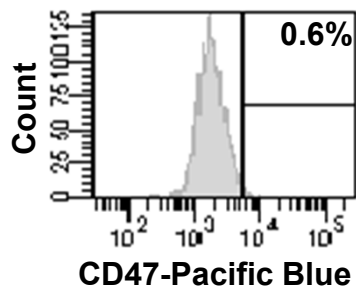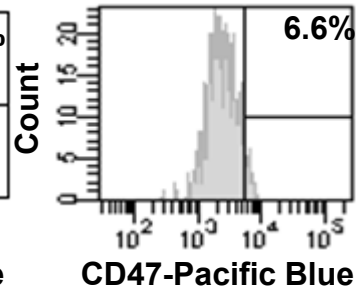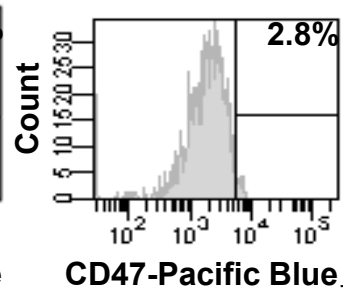

No AbBNPs

50 nm with 10Ab/BNP

100 nm with 25 Ab/BNP

**A**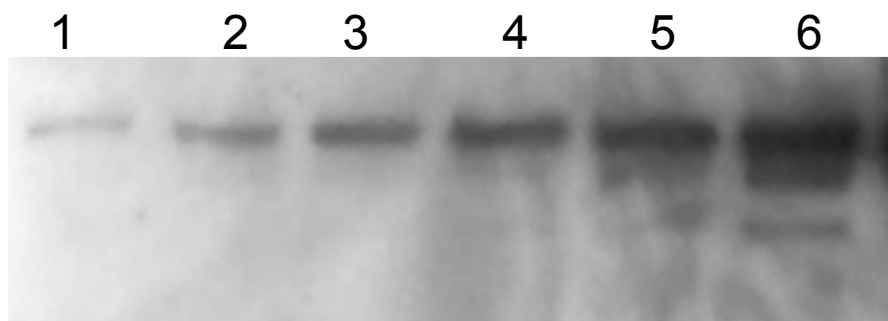**B**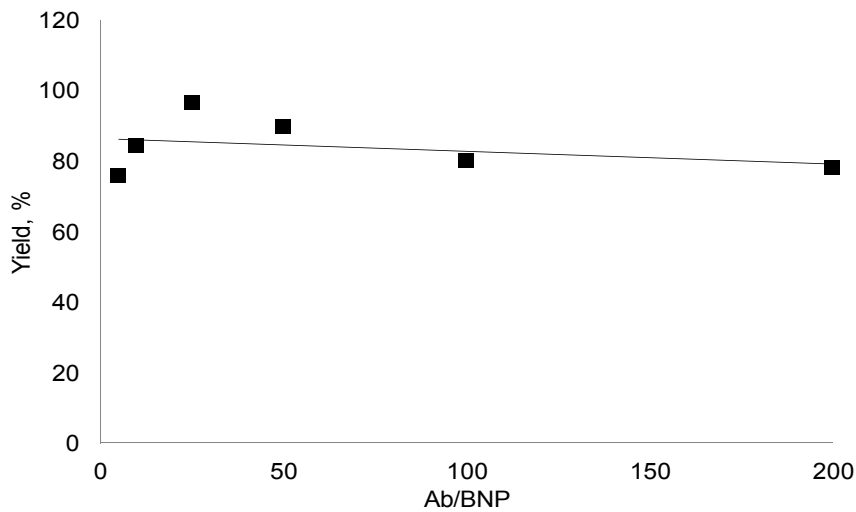



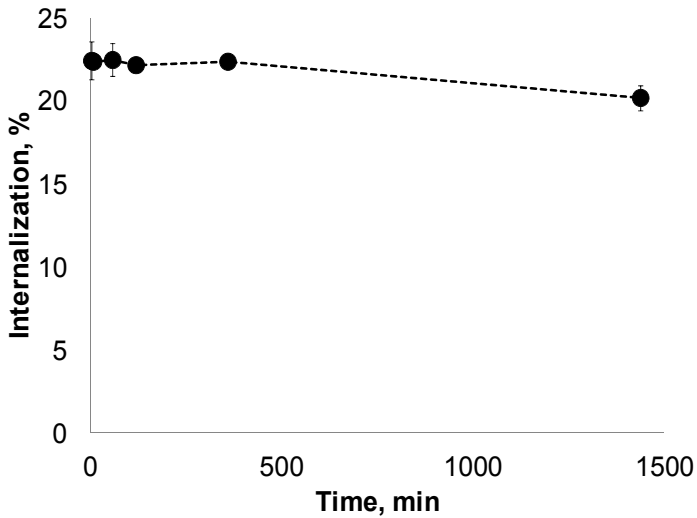

Supplement: NIHMS481324-supplement-Supporting_Info.pdf [file NIHMS481324-supplement-Supporting_Info.pdf]
